# Supplementary material for: Ethanol- and heat-mediated phase change from a kinetic (Z′ = 4) polymorph to a thermodynamic (Z′ = 1) polymorph for an N2,6-diaryl-1,3,5-triazine-2,4-diamine
Source: Royal Society of Chemistry journal article supplement (doi:10.1039/d2ce01548j), 2022-12-19
Supplement: d2ce01548j1.pdf [file d2ce01548j1.pdf]

**Ethanol- and heat-mediated phase change from a kinetic ( $Z' = 4$ ) polymorph to a thermodynamic ( $Z' = 1$ ) polymorph for an  $N^2,6$ -diaryl-1,3,5-triazine-2,4-diamine†**

Sang Loon Tan,<sup>a</sup> Yee Seng Tan,<sup>a</sup> Muhammad Syafiq Bin Shahari,<sup>b</sup> Ahmad Junaid,<sup>c</sup> Anton V. Dolzhenko<sup>b,d</sup> and Edward R. T. Tiekink<sup>a,\*</sup>

<sup>a</sup> Research Centre for Crystalline Materials, School of Medical and Life Sciences, Sunway University, 47500 Bandar Sunway, Selangor Darul Ehsan, Malaysia

<sup>b</sup> School of Pharmacy, Monash University Malaysia, Jalan Lagoon Selatan, Bandar Sunway, Selangor Darul Ehsan 47500, Malaysia

<sup>c</sup> Department of Medicinal Chemistry and Molecular Pharmacology, Purdue University, West Lafayette, Indiana 47907, USA

<sup>d</sup> School of Pharmacy and Biomedical Sciences, Curtin Health Innovation Research Institute, Faculty of Health Sciences, Curtin University, GPO Box U1987, Perth, Western Australia 6845, Australia

**\*\*\* Electronic Supplementary Materials \*\*\***

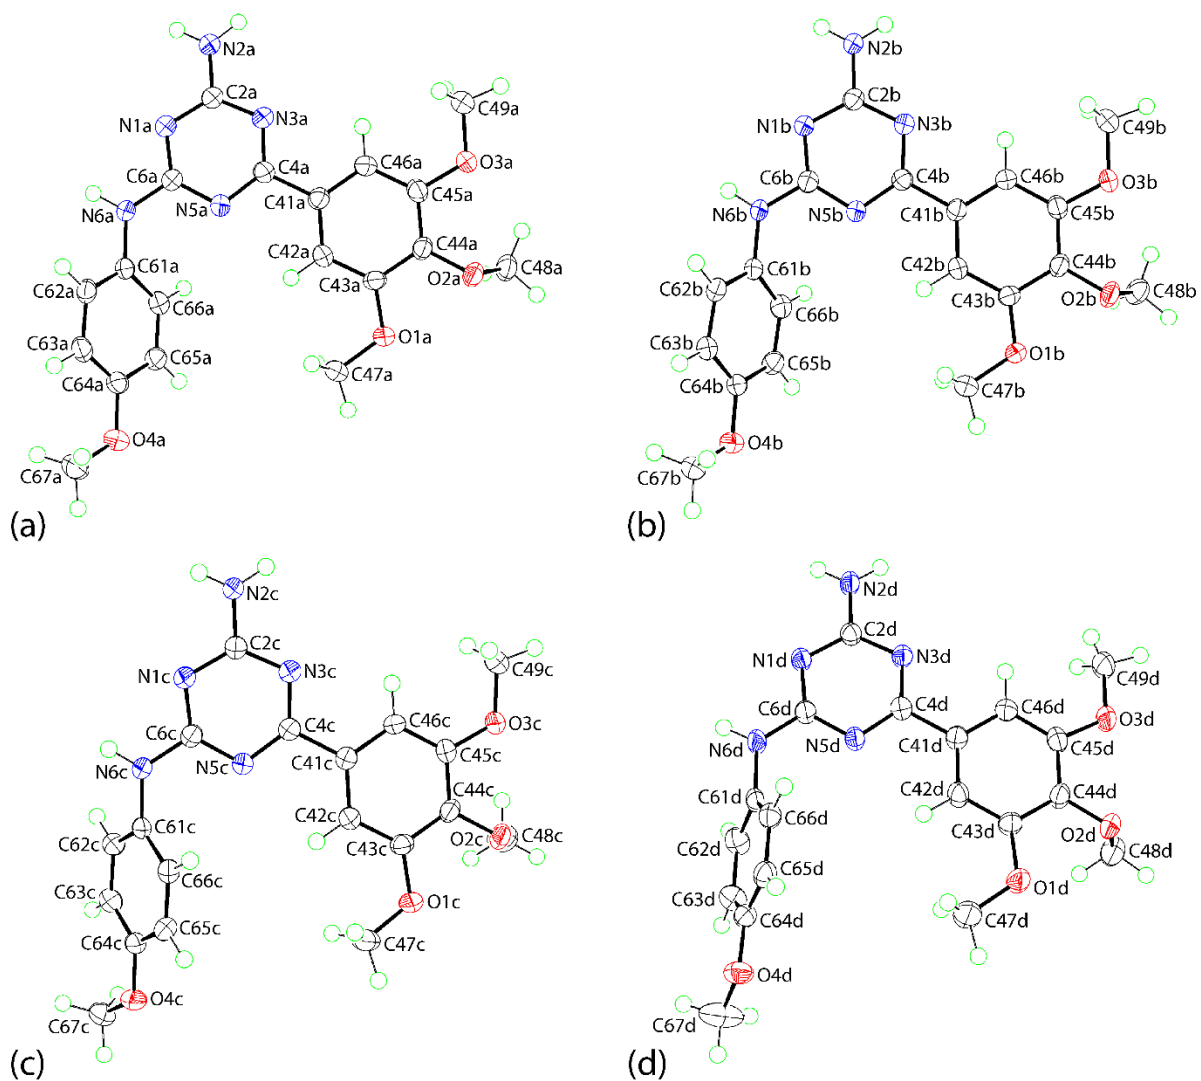

**ESI Figure 1.** Molecular structures for the four independent molecules comprising the asymmetric unit of the  $\alpha$ -polymorph: (a)  $\alpha$ -a, (b)  $\alpha$ -b, (c)  $\alpha$ -c and (d)  $\alpha$ -d, respectively, showing the atom labelling schemes and displacement ellipsoids at the 70% probability level.

**ESI Table 1.** Selected bond lengths (Å) for polymorph  **$\alpha$** , molecules a–d, polymorph- **$\beta$**  and the geometry-optimised molecule, **opt-1**

| Parameters | <b><math>\alpha</math>-a</b> | <b><math>\alpha</math>-b</b> | <b><math>\alpha</math>-c</b> | <b><math>\alpha</math>-d</b> | <b><math>\beta</math></b> | <b>opt-1</b> |
|------------|------------------------------|------------------------------|------------------------------|------------------------------|---------------------------|--------------|
| C2–N1      | 1.3440(18)                   | 1.3448(17)                   | 1.3489(17)                   | 1.3492(17)                   | 1.3474(12)                | 1.329        |
| C6–N1      | 1.3444(18)                   | 1.3452(18)                   | 1.3450(18)                   | 1.3449(18)                   | 1.3472(13)                | 1.336        |
| C2–N3      | 1.3485(18)                   | 1.3516(17)                   | 1.3534(17)                   | 1.3525(17)                   | 1.3557(12)                | 1.340        |
| C4–N3      | 1.3354(18)                   | 1.3327(17)                   | 1.3327(18)                   | 1.3363(18)                   | 1.3316(13)                | 1.326        |
| C4–N5      | 1.3355(18)                   | 1.3368(17)                   | 1.3364(17)                   | 1.3350(17)                   | 1.3347(12)                | 1.331        |
| C6–N5      | 1.3448(17)                   | 1.3484(17)                   | 1.3446(17)                   | 1.3498(17)                   | 1.3427(12)                | 1.329        |
| C2–N2      | 1.3430(19)                   | 1.3397(18)                   | 1.3377(19)                   | 1.3386(18)                   | 1.3382(13)                | 1.348        |
| C6–N6      | 1.3516(18)                   | 1.3539(17)                   | 1.3567(17)                   | 1.3485(17)                   | 1.3538(12)                | 1.356        |

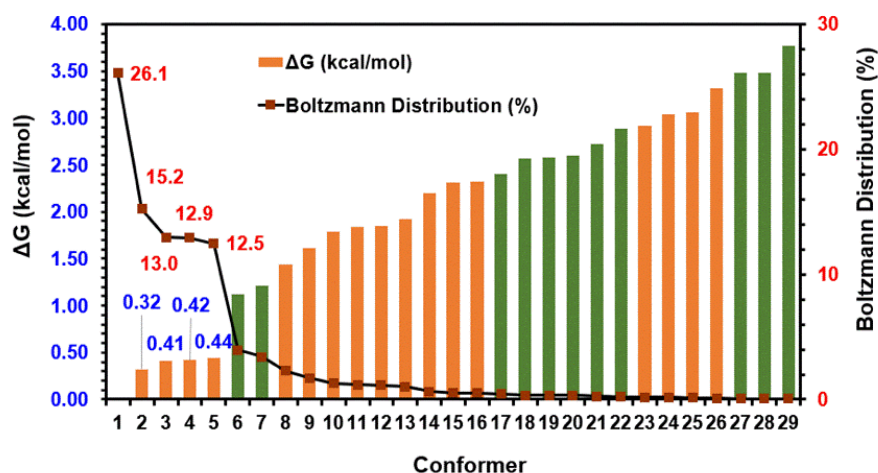

**ESI Figure 2.** The relative Gibbs free energy and Boltzmann distribution for the identified conformers, **opt-1** to **opt-29**, with the orange bars representing +sp (0 to 30°) or –sp (-30 to 0°) and the green bars representing +ap (150 to 180°) or –ap (-180 to -150°) conformations at  $\sigma$ , respectively. For the purposes of clarity, only the data for the first five conformers are labelled.

Beyond the **opt-5** molecule, marked differences are observed in the relative energies (1.12 to 3.76 kcal/mol) and distributions (0.05 to 3.95%) owing to rotation about  $\sigma$  that leads to +ap (176.7 to 178.5°) and –ap (-178.9 to -176.6°) conformations on top of +sp (2.8 to 4.1°) and –sp (-4.1 to -2.7°) conformations as identified for **opt-1** to **opt-5**.

There is a relaxation of the torsion angles at  $\tau$  that lead to the formation of additional +sp (17.05 to 18.59°) and –sp (-18.60 to -17.42°) conformations as observed in **opt-7**, **opt-17**, **opt-18**, **opt-20**, **opt-21**, **opt-27** and **opt-28**. On the other hand, the variation in conformation from +sp (1.19 to 1.89°) or –sp (-1.91 to -0.88°) to +ac (107.13 to 110.56°) or –ac (-110.27 to -107.06°) due to the rotation at  $\chi$  and  $\omega$  also contributed to a further decrease of stability and distribution as observed for **opt-8** to **opt-29**.

**ESI Table 2.** Selected torsion angle data (°) for molecules **opt-1** to **opt-29**

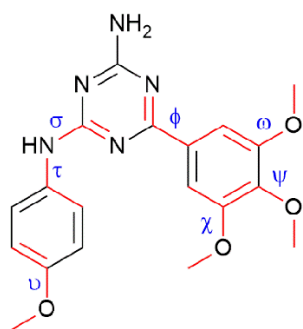

| Torsion Angle |          |        |        |        |        |        |          |
|---------------|----------|--------|--------|--------|--------|--------|----------|
|               | $\sigma$ | $\tau$ | $\nu$  | $\phi$ | $\chi$ | $\psi$ | $\omega$ |
| <b>Opt-1</b>  | 2.3      | -32.9  | 179.8  | -4.6   | -1.2   | 90.6   | 1.5      |
| <b>Opt-2</b>  | 2.8      | -38.7  | -0.2   | -3.6   | -0.9   | -94.8  | 1.4      |
| <b>Opt-3</b>  | -2.7     | 38.3   | -179.4 | 4.3    | -1.4   | 93.6   | 1.6      |
| <b>Opt-4</b>  | 4.1      | -43.8  | 0.2    | 2.2    | 1.6    | -87.5  | -1.6     |
| <b>Opt-5</b>  | -4.1     | 44.0   | 179.4  | 2.1    | -1.8   | 87.5   | 1.6      |
| <b>Opt-6</b>  | -178.4   | -40.8  | 179.5  | -3.6   | -1.3   | 78.8   | 1.9      |
| <b>Opt-7</b>  | 178.5    | 17.1   | -179.6 | -0.8   | -1.6   | 89.2   | 1.5      |
| <b>Opt-8</b>  | -3.6     | -33.4  | 0.2    | 0.1    | -1.9   | 93.3   | 110.4    |
| <b>Opt-9</b>  | -4.1     | 44.3   | -179.4 | 2.8    | -1.3   | 78.0   | 110.3    |
| <b>Opt-10</b> | -2.9     | 39.0   | -0.3   | 4.6    | -0.9   | 79.6   | 109.8    |
| <b>Opt-11</b> | 3.8      | -33.0  | 179.6  | 0.7    | -1.3   | 79.2   | 109.8    |
| <b>Opt-12</b> | 2.8      | -34.5  | 0.2    | -2.6   | -107.1 | 78.0   | 1.1      |
| <b>Opt-13</b> | 4.1      | -38.2  | -0.2   | -2.8   | -108.9 | 102.8  | 1.2      |
| <b>Opt-14</b> | -3.9     | 37.9   | 0.1    | 2.9    | 108.6  | 103.0  | -1.1     |
| <b>Opt-15</b> | 2.9      | -32.9  | 179.8  | -4.8   | -109.5 | 103.0  | 1.2      |
| <b>Opt-16</b> | -3.0     | 33.0   | -179.9 | 4.7    | 109.3  | -102.8 | -1.2     |
| <b>Opt-17</b> | -178.8   | -17.4  | 179.7  | -4.0   | -108.0 | 86.7   | 1.2      |
| <b>Opt-18</b> | -178.6   | 17.4   | 0.1    | 2.1    | 107.1  | -84.4  | 1.2      |
| <b>Opt-19</b> | -180.0   | 38.6   | 179.8  | -0.5   | -109.7 | 101.1  | -1.1     |
| <b>Opt-20</b> | 178.0    | 18.6   | -179.8 | 3.7    | 108.7  | -93.4  | -1.6     |
| <b>Opt-21</b> | -178.8   | -18.6  | 179.8  | -4.8   | -109.1 | 102.2  | 1.9      |
| <b>Opt-22</b> | 178.9    | 38.6   | -179.6 | -0.3   | 107.3  | -79.2  | -110.3   |
| <b>Opt-23</b> | 3.9      | -40.0  | 0.0    | -2.1   | -107.1 | 83.6   | -108.7   |
| <b>Opt-24</b> | 3.8      | 33.1   | -0.2   | -0.7   | 109.6  | -102.7 | -110.1   |
| <b>Opt-25</b> | -3.9     | -34.7  | 179.5  | 0.9    | 110.6  | -103.2 | 110.3    |
| <b>Opt-26</b> | 3.6      | 38.3   | -179.4 | -0.4   | 109.8  | -93.9  | -108.7   |
| <b>Opt-27</b> | -176.9   | -17.4  | 0.1    | -0.1   | -110.3 | 79.3   | 109.4    |
| <b>Opt-28</b> | -178.4   | -17.8  | 179.4  | 0.2    | -110.2 | 93.2   | 109.1    |
| <b>Opt-29</b> | -176.6   | -32.0  | 0.3    | -0.0   | 109.2  | -86.9  | -110.1   |

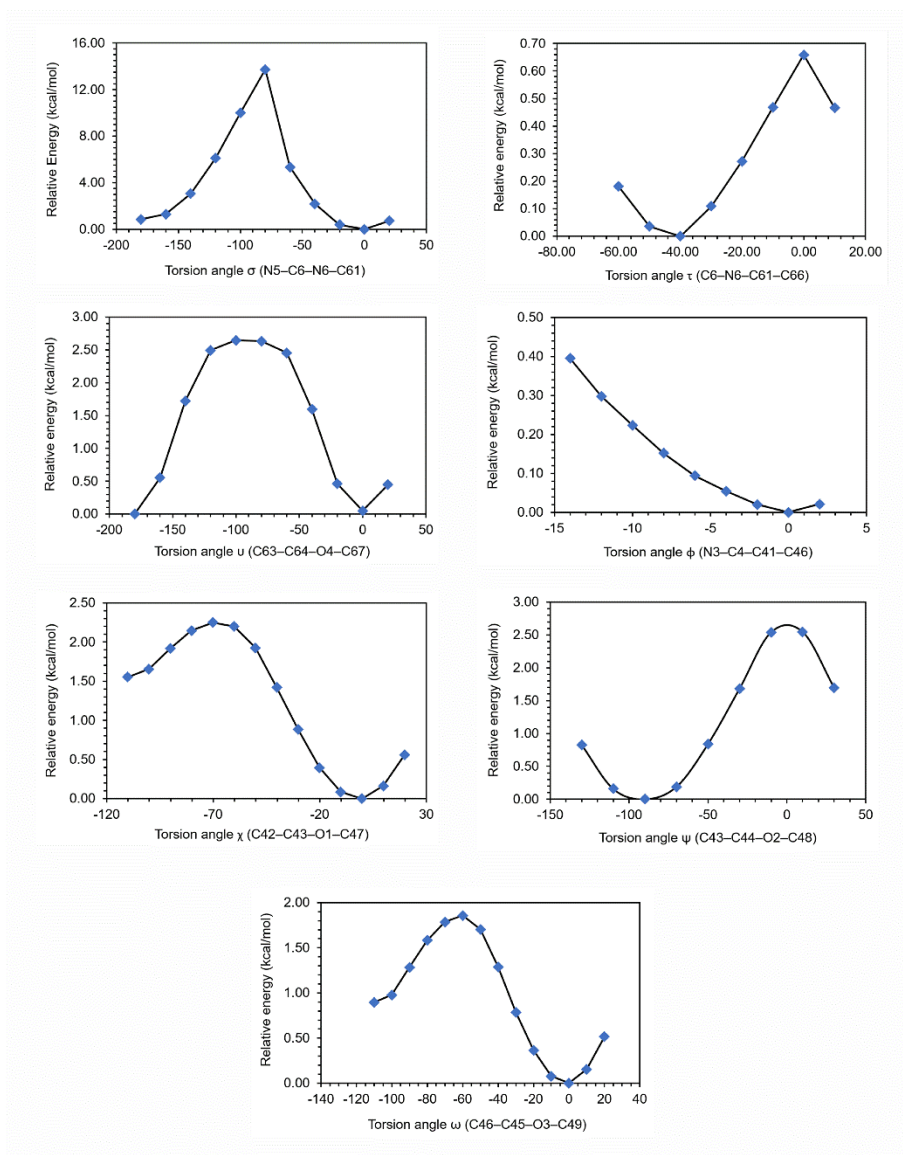

**ESI Figure 3.** The potential energy profiles upon incremental rotation about the  $\sigma$ ,  $\tau$ ,  $\nu$ ,  $\phi$ ,  $\chi$ ,  $\psi$  and  $\omega$ , respectively. Owing to the computational cost involved, only rotation around the negative angles were allowed. The simulations show that the potential energies are peaked at approximately  $-80$ ,  $-70$ ,  $-60$  and  $-14^\circ$  for  $\sigma$ ,  $\chi$ ,  $\omega$  and  $\phi$ , respectively, before gradually stabilising to a minimum at about  $0^\circ$ . Torsion angle  $\nu$  is most stable at  $-180^\circ$  and progressively increases in energy to reach a peak at about  $-90^\circ$  before being stabilised again at *ca*  $0^\circ$ . For the  $\psi$  and  $\tau$  torsion angles, the minimum energy is at *ca*  $-90$  and  $-40^\circ$ , respectively, with the maximum energy reached at about  $0^\circ$ .

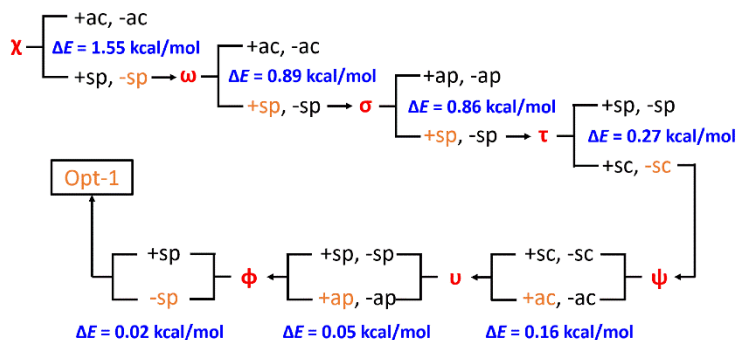

**ESI Figure 4.** Proposed rank of stability based on the rotational energy barrier at the respective torsion angles.

**Opt-22** to **opt-29** are ranked with greatest energy and at the bottom of the Boltzmann distribution mainly because they adopt a +ac or -ac conformation at both  $\chi$  and  $\omega$  which have the greatest rotation energy barriers of 1.55 and 0.89 kcal/mol, respectively; to be in the form of +sp or -sp would lead to an improvement in the stability ranking. The rotational energy barrier from +ac/-ac to +sp/-sp for  $\chi$  is greater than that of  $\omega$  owing to the steric hindrance from the 4-methoxyphenyl residue. Conformers **opt-12** to **opt-21** have structures with +ac/-ac at  $\chi$  and +sp/-sp at  $\omega$ , while the opposite is true for **opt-8** to **opt-11**. The next determining factor in the stability ranking is the rotation at  $\sigma$  which results in two main groups of conformers, *viz.* +ap/-ap and +sp/-sp, of which the former group is relatively less stable with a rotation barrier of about 0.86 kcal/mol. Conformers **opt-6**, **opt-7** as well as other lower ranked structures have +ap/-ap while +sp/-sp is mainly found in **opt-1** to **opt-5**. Moving up the rank of stability is the rotation at  $\tau$  with an energy barrier of 0.27 kcal/mol from +sp/-sp to +sc/-sc, the former is only observed along with +ap or -ap conformation at  $\sigma$  such as that found in **opt-7** and other lower ranked structures. Rotation about  $\psi$ ,  $\nu$  and  $\phi$  positions concludes the ranking in the conformational stability with small energy barriers of 0.16, 0.05 and 0.02 kcal/mol, respectively. This observation leads to interchangeable conformation between +sc/-sc and +ac/-ac for  $\psi$ , +sp/-sp and +ap/-ap for  $\nu$  as well as +sp and -sp for  $\phi$ , all of which occur throughout **opt-1** to **opt-29**.

**ESI Table 3.** Computed NPA charge (e) for selected atoms in **opt-1**

| <b>Atom</b> | <b>NPA charge</b> |
|-------------|-------------------|
| N1          | -0.586            |
| N2          | -0.767            |
| H1n         | 0.402             |
| H2n         | 0.402             |
| N3          | -0.571            |
| N5          | -0.580            |
| N6          | -0.549            |
| H3n         | 0.406             |
| C2          | 0.586             |
| C4          | 0.469             |
| C6          | 0.600             |
| C61         | 0.112             |
| O1          | -0.454            |
| O2          | -0.475            |
| O3          | -0.454            |
| O4          | -0.457            |



**ESI Table 4.** The hybrid composition of selected natural bonding orbitals for **opt-1**

| C···N  | C                           |                 |                 | N                           |                 |                 |
|--------|-----------------------------|-----------------|-----------------|-----------------------------|-----------------|-----------------|
|        | Overall<br>occupancy<br>(%) | <i>s</i><br>(%) | <i>p</i><br>(%) | Overall<br>occupancy<br>(%) | <i>s</i><br>(%) | <i>p</i><br>(%) |
| C2–N2  | 59.5                        | 31.1            | 68.9            | 40.5                        | 37.8            | 61.9            |
| C6–N6  | 60.5                        | 30.8            | 69.2            | 39.5                        | 36.3            | 63.4            |
| C61–N6 | 60.9                        | 28.2            | 71.8            | 39.1                        | 36.6            | 63.2            |

**ESI Table 5.** A summary of the geometric parameters (Å, °) characterising the identified intermolecular contacts in the crystals of the  $\alpha$ - and  $\beta$ -polymorphs

| Contact                    | H $\cdots$ B | A $\cdots$ B | A–H $\cdots$ B | Symmetry operation                         |
|----------------------------|--------------|--------------|----------------|--------------------------------------------|
| <b><math>\alpha</math></b> |              |              |                |                                            |
| <i>Intra-layer region</i>  |              |              |                |                                            |
| N6a–H3n $\cdots$ N1d       | 2.216(16)    | 3.1074(16)   | 169.4(14)      | $2 - x, -\frac{1}{2} + y, \frac{3}{2} - z$ |
| N2a–H2n $\cdots$ O1c       | 2.246(16)    | 3.1443(16)   | 175.6(14)      | $x, \frac{1}{2} - y, -\frac{1}{2} + z$     |
| N6b–H6n $\cdots$ N1c       | 2.237(16)    | 3.0963(16)   | 167.5(14)      | $x, y, z$                                  |
| N2b–H5n $\cdots$ O1d       | 2.269(16)    | 3.1511(17)   | 177.2(14)      | $1 - x, 1 - y, 1 - z$                      |
| N6c–H9n $\cdots$ N1b       | 2.301(16)    | 3.1693(16)   | 171.3(15)      | $x, y, z$                                  |
| N2c–H8n $\cdots$ O1a       | 2.341(17)    | 3.2219(16)   | 173.5(16)      | $x, \frac{3}{2} - y, \frac{1}{2} + z$      |
| N6d–H12n $\cdots$ N1a      | 2.127(16)    | 3.0425(16)   | 168.6(14)      | $2 - x, \frac{1}{2} + y, \frac{3}{2} - z$  |
| N2d–H11n $\cdots$ O1b      | 2.244(16)    | 3.1026(16)   | 166.9(14)      | $1 - x, 2 - y, 1 - z$                      |
| C67b–H67f $\cdots$ O3a     | 2.55         | 3.3175(17)   | 135            | $x, \frac{3}{2} - y, \frac{1}{2} + z$      |
| C49a–H49b $\cdots$ O4c     | 2.49         | 3.3368(18)   | 145            | $x, \frac{1}{2} - y, -\frac{1}{2} + z$     |

|                                          |      |            |                      |                                             |
|------------------------------------------|------|------------|----------------------|---------------------------------------------|
| C49d–H49k···O4b                          | 2.53 | 3.477(2)   | 161                  | $1 - x, 2 - y, 1 - z$                       |
| C67c–H67h···O4b                          | 2.59 | 3.4514(17) | 147                  | $x, -1 + y, z$                              |
| C49c–H49h···O4a                          | 2.56 | 3.3931(19) | 143                  | $x, \frac{3}{2} - y, \frac{1}{2} + z$       |
| C49b–H49e···O4d                          | 2.34 | 3.2901(19) | 164                  | $1 - x, 1 - y, 1 - z$                       |
| C67a–H67b···O4d                          | 2.57 | 3.4580(19) | 151                  | $2 - x, \frac{1}{2} + y, \frac{3}{2} - z$   |
| <i>Inter-layer region</i>                |      |            |                      |                                             |
| C47c–H47g···O1a                          | 2.51 | 3.4361(18) | 158                  | $1 - x, 1 - y, 1 - z$                       |
| C63a–H63a···O2d                          | 2.56 | 3.4396(16) | 154                  | $x, y, z$                                   |
| C63b–H63b···O2c                          | 2.39 | 3.3216(16) | 165                  | $1 - x, \frac{1}{2} + y, \frac{3}{2} - z$   |
| C48d–H48j···N3a                          | 2.56 | 3.4490(19) | 151                  | $x, \frac{1}{2} - y, \frac{1}{2} + z$       |
| C62b–H62b···N2a                          | 2.50 | 3.3381(19) | 147                  | $1 - x, 1 - y, 1 - z$                       |
| Cg(N1b,N3b,N5b,C2b,C4b,C5b)···           |      |            |                      |                                             |
| Cg(N1d,N3d,N5d,C2d,C4d,C5d)              | –    | 3.7690(7)  | 3.42(6) <sup>a</sup> | $-1 + x, \frac{3}{2} - y, -\frac{1}{2} + z$ |
| C63d–H63d··· Cg(N1d,N3d,N5d,C2d,C4d,C5d) | 2.70 | 3.5702(16) | 153                  | $2 - x, 1 - y, 2 - z$                       |

**$\beta$** 

|                                               |           |            |                |                                                 |
|-----------------------------------------------|-----------|------------|----------------|-------------------------------------------------|
| N6–H3n···N1                                   | 2.144(10) | 3.0196(12) | 173.1(11)      | $-x, 1-y, 1-z$                                  |
| N2–H2n···O1                                   | 2.085(11) | 2.9543(12) | 171.8(11)      | $\frac{3}{2}-x, \frac{1}{2}+y, \frac{3}{2}-z$   |
| Cg(N1,N3,N5,C2,C4,C5)···Cg(N1,N3,N5,C2,C4,C5) | –         | 3.4964(5)  | 0 <sup>a</sup> | $1-x, 1-y, 1-z$                                 |
| C62–H62···Cg(C41-C46)                         | 2.85      | 3.6450(11) | 141            | $-1+x, y, z$                                    |
| C67–H67a···Cg(C41-C46)                        | 2.86      | 3.7698(15) | 155            | $-\frac{1}{2}+x, \frac{1}{2}-y, -\frac{1}{2}+z$ |
| C48–H48b···Cg(C61-C66)                        | 2.93      | 3.8184(12) | 152            | $\frac{3}{2}+x, \frac{1}{2}-y, \frac{1}{2}+z$   |

---

a value refers to the angle between the specified aromatic rings

**ESI Table 6.** The  $d_{\text{norm}}$  contact distances (adjusted to neutron values) for all identified interactions present in the individual molecules of the  $\alpha$ - and  $\beta$ -polymorphs with respect to the corresponding sum of van der Waals radii

| Contact (Donor $\cdots$ Acceptor) | Distance (Å) | $\Sigma$ vdW (Å) | Symmetry operation                         |
|-----------------------------------|--------------|------------------|--------------------------------------------|
| <b><math>\alpha</math>-a</b>      |              |                  |                                            |
| N6a–H3n $\cdots$ N1d              | 2.11         | 2.64             | $2 - x, -\frac{1}{2} + y, \frac{3}{2} - z$ |
| N2a–H2n $\cdots$ O1c              | 2.14         | 2.61             | $x, \frac{1}{2} - y, -\frac{1}{2} + z$     |
| C49a–H49b $\cdots$ O4c            | 2.41         | 2.61             | $x, \frac{1}{2} - y, -\frac{1}{2} + z$     |
| N2a–H2n $\cdots$ O2c              | 2.57         | 2.61             | $x, \frac{1}{2} - y, -\frac{1}{2} + z$     |
| N2a–H1n $\cdots$ C62d             | 2.78         | 2.79             | $2 - x, -\frac{1}{2} + y, \frac{3}{2} - z$ |
| C63a–H63a $\cdots$ O2d            | 2.44         | 2.61             | $x, y, z$                                  |
| C67a–H67b $\cdots$ O4d            | 2.48         | 2.61             | $2 - x, \frac{1}{2} + y, \frac{3}{2} - z$  |
| C62a–H62a $\cdots$ N2b            | 2.53         | 2.64             | $1 - x, 1 - y, 1 - z$                      |
| C67a–H67a $\cdots$ O3d            | 2.57         | 2.61             | $x, y, z$                                  |
| C67a–H67c $\cdots$ O3b            | 2.57         | 2.61             | $1 + x, \frac{3}{2} - y, \frac{1}{2} + z$  |
| C48a–H48a $\cdots$ N1b            | 2.58         | 2.64             | $1 - x, -\frac{1}{2} + y, \frac{1}{2} - z$ |
| <b><math>\alpha</math>-b</b>      |              |                  |                                            |
| N6b–H6n $\cdots$ N1c              | 2.11         | 2.64             | $x, y, z$                                  |
| N2b–H5n $\cdots$ O1d              | 2.14         | 2.61             | $1 - x, 1 - y, 1 - z$                      |
| C49b–H49e $\cdots$ O4d            | 2.24         | 2.61             | $1 - x, 1 - y, 1 - z$                      |
| N2b–H5n $\cdots$ O2d              | 2.57         | 2.61             | $1 - x, 1 - y, 1 - z$                      |
| N2b–H4n $\cdots$ C62c             | 2.66         | 2.79             | $x, y, z$                                  |
| C63b–H63b $\cdots$ O2c            | 2.27         | 2.61             | $1 - x, \frac{1}{2} + y, \frac{3}{2} - z$  |
| C67b–H67f $\cdots$ O3a            | 2.48         | 2.61             | $x, \frac{3}{2} - y, \frac{1}{2} + z$      |

|                  |      |      |                                             |
|------------------|------|------|---------------------------------------------|
| C48b–H48e···C63a | 2.78 | 2.79 | $-1 + x, \frac{3}{2} - y, -\frac{1}{2} + z$ |
|------------------|------|------|---------------------------------------------|

**$\alpha$ -c**

|                  |      |      |                                       |
|------------------|------|------|---------------------------------------|
| N6c–H9n···N1b    | 2.17 | 2.64 | $x, y, z$                             |
| N2c–H8n···O1a    | 2.22 | 2.61 | $x, \frac{3}{2} - y, \frac{1}{2} + z$ |
| C49c–H49h···O4a  | 2.48 | 2.61 | $x, \frac{3}{2} - y, \frac{1}{2} + z$ |
| N2c–H8n···O2a    | 2.56 | 2.61 | $x, \frac{3}{2} - y, \frac{1}{2} + z$ |
| N2c–H7n···C62b   | 2.36 | 2.79 | $x, y, z$                             |
| C47c–H47g···O1a  | 2.42 | 2.61 | $1 - x, 1 - y, 1 - z$                 |
| C67c–H67h···O4b  | 2.50 | 2.61 | $x, -1 + y, z$                        |
| C48c–H48g···C45d | 2.55 | 2.79 | $x, y, z$                             |
| C48c–H48h···C63d | 2.56 | 2.79 | $2 - x, 1 - y, 2 - z$                 |
| C48c–H48g···C46d | 2.63 | 2.79 | $x, y, z$                             |
| C47c–H47g···C43a | 2.76 | 2.79 | $1 - x, 1 - y, 1 - z$                 |

**$\alpha$ -d**

|                 |      |      |                                           |
|-----------------|------|------|-------------------------------------------|
| N6d–H12n···N1a  | 2.05 | 2.64 | $2 - x, \frac{1}{2} + y, \frac{3}{2} - z$ |
| N2d–H11n···O1b  | 2.11 | 2.61 | $1 - x, 2 - y, 1 - z$                     |
| C49d–H49k···O4b | 2.44 | 2.61 | $1 - x, 2 - y, 1 - z$                     |
| N2d–H11n···O2b  | 2.60 | 2.61 | $1 - x, 2 - y, 1 - z$                     |
| N2d–H10n···C62a | 2.45 | 2.79 | $2 - x, \frac{1}{2} + y, \frac{3}{2} - z$ |
| C48d–H48j···N3a | 2.47 | 2.64 | $x, \frac{1}{2} - y, \frac{1}{2} + z$     |

**$\beta$**

|             |      |      |                    |
|-------------|------|------|--------------------|
| N6–H3n···N1 | 2.02 | 2.64 | $-x, 1 - y, 1 - z$ |
|-------------|------|------|--------------------|

|               |      |      |                                                     |
|---------------|------|------|-----------------------------------------------------|
| N2–H2n···O1   | 1.95 | 2.61 | $\frac{3}{2} - x, \frac{1}{2} + y, \frac{3}{2} - z$ |
| N2–H2n···O2   | 2.49 | 2.61 | $\frac{3}{2} - x, \frac{1}{2} + y, \frac{3}{2} - z$ |
| N2–H1n···C62  | 2.34 | 2.79 | $-x, 1 - y, 1 - z$                                  |
| C62–H62···C43 | 2.61 | 2.79 | $-1 + x, y, z$                                      |
| C47–H47c···N3 | 2.58 | 2.64 | $\frac{3}{2} - x, \frac{1}{2} + y, \frac{3}{2} - z$ |
| C66–H66···N2  | 2.63 | 2.64 | $1 - x, 1 - y, 1 - z$                               |
| H46···H47c    | 2.10 | 2.18 | $\frac{3}{2} - x, \frac{1}{2} + y, \frac{3}{2} - z$ |

---

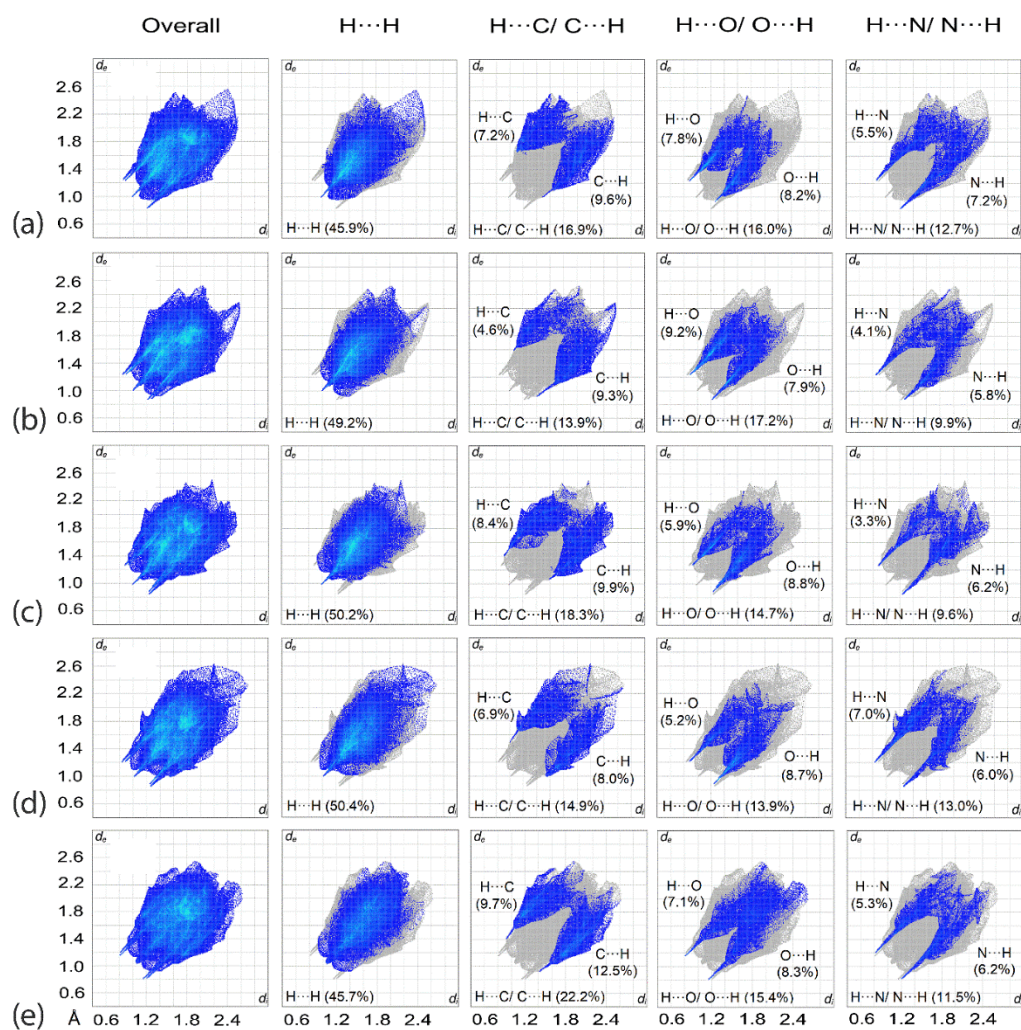

**ESI Figure 5.** The overall two-dimensional fingerprint and decomposed plots delineated into specific contacts along with the distribution for (a)  $\alpha$ -a, (b)  $\alpha$ -b, (c)  $\alpha$ -c, (d)  $\alpha$ -d and (e)  $\beta$ .



**ESI Table 7.** Interaction energies (kcal/mol) for the weaker close contacts present in the crystal of the  $\alpha$ -polymorph of **1**

| Close contact                                     | $E_{\text{ele}}$ | $E_{\text{pol}}$ | $E_{\text{disp}}$ | $E_{\text{rep}}$ | $E_{\text{int}}$ | Symmetry operation                        |
|---------------------------------------------------|------------------|------------------|-------------------|------------------|------------------|-------------------------------------------|
| C48c–H48g $\cdots$ C45d + C48c–H48g $\cdots$ C46d | –3.0             | –0.3             | –9.2              | 5.8              | –6.6             | $x, y, z$                                 |
| C67c–H67h $\cdots$ O4b                            | –3.7             | –0.9             | –4.2              | 2.7              | –6.0             | $x, -1 + y, z$                            |
| C63a–H63a $\cdots$ O2d + C67a–H67a $\cdots$ O3d   | –3.2             | –0.8             | –4.5              | 2.8              | –5.6             | $x, y, z$                                 |
| C48d–H48j $\cdots$ N3a                            | –1.1             | –0.4             | –6.7              | 2.6              | –5.6             | $x, \frac{1}{2} - y, -\frac{1}{2} + z$    |
| C67b–H67f $\cdots$ O3a                            | –2.6             | –0.5             | –5.0              | 3.1              | –5.0             | $x, \frac{3}{2} - y, -\frac{1}{2} + z$    |
| C67a–H67c $\cdots$ O3b + C48b–H48e $\cdots$ C63a  | –2.3             | –0.4             | –4.6              | 2.6              | –4.8             | $1 + x, \frac{3}{2} - y, \frac{1}{2} + z$ |
| C62a–H62a $\cdots$ N2b + C62b–H62b $\cdots$ N2a   | –2.3             | –0.3             | –5.3              | 4.1              | –3.8             | $1 - x, 1 - y, 1 - z$                     |
| C67a–H67b $\cdots$ O4d                            | –2.0             | –0.2             | –1.9              | 1.2              | –2.9             | $2 - x, \frac{1}{2} + y, \frac{3}{2} - z$ |
| C63b–H63b $\cdots$ O2c                            | –2.0             | –0.2             | –1.9              | 1.2              | –2.9             | $1 - x, \frac{1}{2} + y, \frac{3}{2} - z$ |
| C48d–H48k $\cdots$ C63c                           | –0.6             | –0.3             | –3.7              | 2.2              | –2.5             | $1 - x, 1 - y, 1 - z$                     |
| C48c–H48h $\cdots$ C63d                           | –0.7             | –0.3             | –3.6              | 2.6              | –2.0             | $2 - x, 1 - y, 2 - z$                     |
| C48b–H48f $\cdots$ C48b                           | –0.5             | 0.0              | –2.1              | 1.0              | –1.5             | $-x, 2 - y, -z$                           |

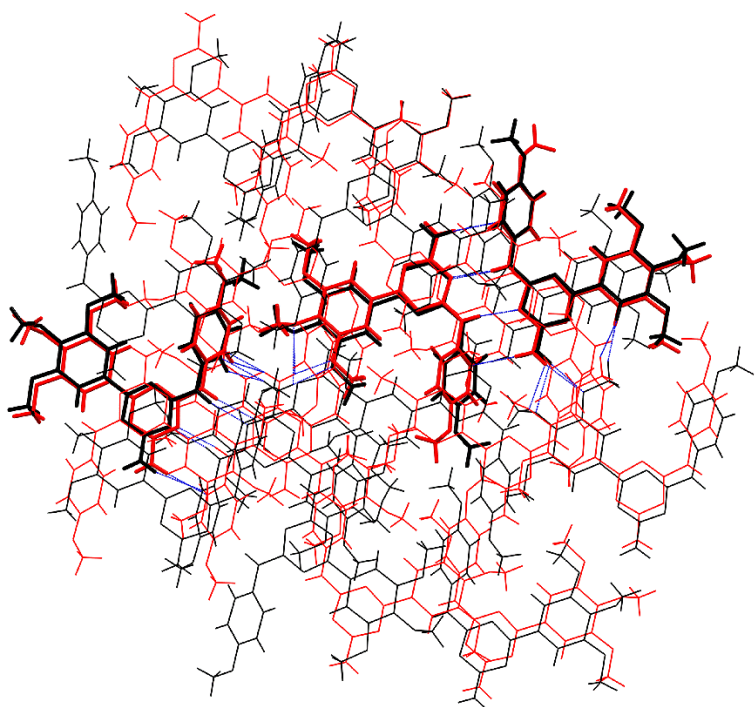

**ESI Figure 6.** The molecular packing analysis between the  $\alpha$ - (black) and  $\beta$ - (red) polymorphs, showing three (in capped stick representation) out of 15 molecules (in wireframe) overlapped. The overlapped molecules in both polymorphs exhibit common interaction patterns as illustrated by the blue dotted line.

**ESI Table 8.** Unit-cell data on a single crystal for a heating/cooling cycle showing the irreversible SCSC phase change from the  $\alpha$ - to  $\beta$ -polymorph. The unit-cell data for the first measurement at 298 K corresponds to the  $\alpha$ -polymorph, whereas the unit-cell data for the subsequent experiments, *i.e.* 398, 298 and 100 K, correspond to the  $\beta$ -polymorph

**First unit-cell determination (298 K):**

|                               |             |
|-------------------------------|-------------|
| _cell_length_a                | 19.0392(18) |
| _cell_length_b                | 18.0969(14) |
| _cell_length_c                | 22.660(2)   |
| _cell_angle_alpha             | 90.0        |
| _cell_angle_beta              | 104.539(9)  |
| _cell_angle_gamma             | 90.0        |
| _cell_volume                  | 7558(1)     |
| _cell_measurement_temperature | 297.95(10)  |

**Third unit-cell determination (298 K):**

|                               |            |
|-------------------------------|------------|
| _cell_length_a                | 8.229(5)   |
| _cell_length_b                | 17.654(9)  |
| _cell_length_c                | 15.378(9)  |
| _cell_angle_alpha             | 90.0       |
| _cell_angle_beta              | 102.50(6)  |
| _cell_angle_gamma             | 90.0       |
| _cell_volume                  | 2181(2)    |
| _cell_measurement_temperature | 297.99(10) |

**Second unit-cell determination (398 K):**

|                               |            |
|-------------------------------|------------|
| _cell_length_a                | 8.181(5)   |
| _cell_length_b                | 17.597(7)  |
| _cell_length_c                | 15.685(7)  |
| _cell_angle_alpha             | 90.0       |
| _cell_angle_beta              | 103.16(5)  |
| _cell_angle_gamma             | 90.0       |
| _cell_volume                  | 2199(2)    |
| _cell_measurement_temperature | 397.98(10) |

**Fourth unit-cell determination (100 K):**

|                               |            |
|-------------------------------|------------|
| _cell_length_a                | 8.070(5)   |
| _cell_length_b                | 17.291(18) |
| _cell_length_c                | 14.256(7)  |
| _cell_angle_alpha             | 90.0       |
| _cell_angle_beta              | 101.48(6)  |
| _cell_angle_gamma             | 90.0       |
| _cell_volume                  | 1949(3)    |
| _cell_measurement_temperature | 99.98(10)  |

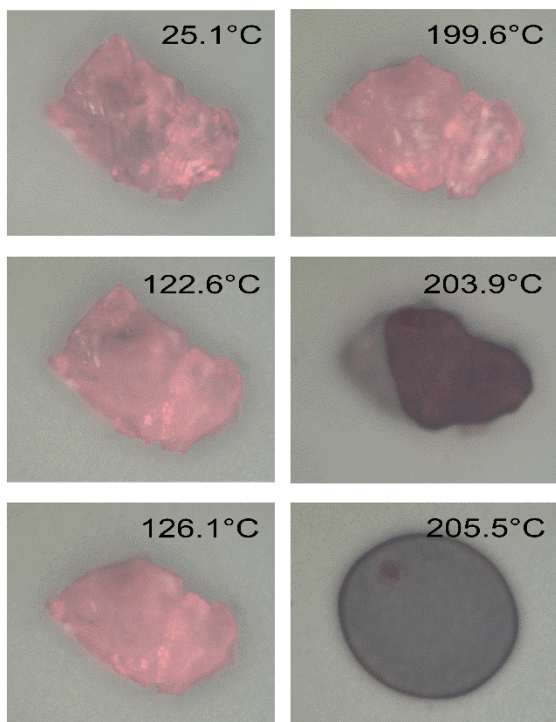

(a)

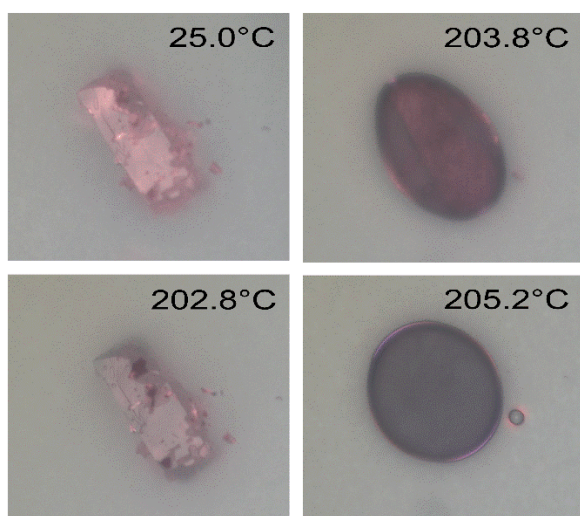

(b)

**ESI Figure 7.** Images of the heating cycle in the thermo-microscopic study for the (a)  $\alpha$ -polymorph and (b)  $\beta$ -polymorph. The key result is the same melting events between 203–206 °C.
